# Supplementary material for: Effectiveness of an educational intervention to improve antibiotic dispensing practices for acute respiratory illness among drug sellers in pharmacies, a pilot study in Bangladesh
Source: PubMed Central journal article supplement (PMC6119333; doi:10.1186/s12913-018-3486-y), 2018-08-31
Supplement: 12913_2018_3486_MOESM3_ESM.pdf [file 12913_2018_3486_MOESM3_ESM.pdf]

### Appendix 3: Questionnaire for drug sellers after educational intervention

Dispensing practices and impact of educational intervention for acute respiratory illness among drug sellers, A pilot study in Bangladesh

বাংলাদেশে ঔষধ বিক্রেতাদের মধ্যে শ্বাসতন্ত্রের প্রদাহ জনিত রোগে ঔষধ-বিতরণ প্র্যাকটিস এবং তাদের মধ্যে এ রোগের চিকিৎসা সংক্রান্ত শিক্ষামূলক মধ্যবর্তিতার প্রভাব: একটি প্রাথমিক সমীক্ষা

| ক্রমিক<br>নং | প্রশ্ন                                                                                                                                                              | উত্তর                                                         | নির্দেশনা                                                                                                                                                                             |
|--------------|---------------------------------------------------------------------------------------------------------------------------------------------------------------------|---------------------------------------------------------------|---------------------------------------------------------------------------------------------------------------------------------------------------------------------------------------|
| 101.         | ফার্মেসীর নাম এবং কোড নম্বর<br>(Name of the Pharmacy & code):                                                                                                       | <input type="text"/>                                          |                                                                                                                                                                                       |
| 102.         | প্রশিক্ষিত প্রাপ্ত ঔষধ বিক্রেতার নাম:<br>(Trained drug seller's Name):                                                                                              |                                                               |                                                                                                                                                                                       |
| 103.         | সাক্ষাৎকার গ্রহণকারীর নাম এবং কোড নম্বর:<br>(Interviewers name & code)                                                                                              | <input type="text"/>                                          |                                                                                                                                                                                       |
| 104.         | ভিজিটের তারিখ (Date of visit):                                                                                                                                      | <input type="text"/>                                          |                                                                                                                                                                                       |
| 105.         | সুপারভাইজারের নাম, স্বাক্ষর<br>(Name of supervisor & Signature)<br>তারিখ: ----/----/2013                                                                            | <input type="text"/>                                          |                                                                                                                                                                                       |
| 106.         | ডাটা এন্ট্রিকারীর নাম, স্বাক্ষর<br>(Data Entry Person & Signature)<br>তারিখ: ----/----/2013                                                                         | <input type="text"/>                                          |                                                                                                                                                                                       |
| 201.         | আপনি কি শ্বাসতন্ত্রের প্রদাহ জনিত রোগের ব্যবস্থাপনা বিষয়ক প্রশিক্ষণে অংশগ্রহণ করেছেন?<br>(Did you attend the training on Management of acute respiratory Illness?) | Yes (হ্যাঁ)= 1<br>No (না) = 2<br>Not applicable (জানি না) = 3 | <input type="text"/>                                                                                                                                                                  |
| 202.         | আপনি কি মনে করেন প্রশিক্ষণ টি উপকারী ছিল?<br>(Do you think it was useful?)                                                                                          | Yes (হ্যাঁ)= 1<br>No (না) = 2<br>Not applicable (জানি না) = 3 | <input type="text"/><br>যদি উত্তর “না” হয়, তাহলে “204” নম্বর প্রশ্ন করুন এবং যদি উত্তর “হ্যাঁ” হয়, তাহলে “203” নম্বর প্রশ্ন করুন<br>If no skip question “203” and if yes skip “204” |

|                                                                                                                 |                                                                                                                                                       |                                                                                   |                                                                          |
|-----------------------------------------------------------------------------------------------------------------|-------------------------------------------------------------------------------------------------------------------------------------------------------|-----------------------------------------------------------------------------------|--------------------------------------------------------------------------|
| 203.                                                                                                            | যদি হ্যাঁ হয়, কেন (বর্ণনা করুন)? (If yes, why) Please Probe this Question:<br>-----                                                                  |                                                                                   |                                                                          |
| 204.                                                                                                            | যদি না হয়, কেন (বর্ণনা করুন)? (If no, why) Please Proving this Question:<br>-----                                                                    |                                                                                   |                                                                          |
| 205.                                                                                                            | আপনাকে ট্রেনিং-এ যে নির্দেশিকা টি দেয়া হয়েছিল সেটি কোথায় সংরক্ষণ করেন / রেখেছেন?(where do you keep the manual which was Provided during training?) | বাসায় = 1<br>দোকানে = 2<br>চেম্বারে = 3<br>বন্ধুর কাছে = 4<br>হারানো গিয়াছে = 5 | <input type="checkbox"/>                                                 |
| 206.                                                                                                            | নির্দেশিকা টি পড়ে দেখেছিলেন কি ? (Did you read the manual?)                                                                                          | Yes (হ্যাঁ) = 1<br>No (না) = 2<br>Not applicable (জানি না) = 3                    | <input type="checkbox"/> উত্তর না হলে "207" নং প্রশ্ন করার প্রয়োজন নাই। |
| 207.                                                                                                            | নির্দেশিকা টি পড়তে বা বুঝতে কোন সমস্যা আছে ? (Do you feel any problem to read and understand the manual)                                             | Yes (হ্যাঁ)= 1<br>No (না) = 2<br>Not applicable (জানি না) = 3                     | <input type="checkbox"/> উত্তর হ্যাঁ হলে "208" নং প্রশ্ন করুন।           |
| 208.                                                                                                            | নির্দেশিকা টিতে কি সমস্যা আছে বলে আপনার মনে হয় ? Please Probe this Question: (What problems are there in the manual )<br>-----                       |                                                                                   |                                                                          |
| 209.                                                                                                            | আপনি কি নির্দেশিকা টি সম্পূর্ণ মেনে চলেন? (Do you follow the manual completely)                                                                       | Yes (হ্যাঁ)= 1<br>No (না) = 2<br>Not applicable (জানি না) = 3                     | <input type="checkbox"/>                                                 |
| 210.                                                                                                            | যদি না হয়, কেন (বর্ণনা করুন)? (If not, why) Please Proving this Question:<br>-----                                                                   |                                                                                   |                                                                          |
| 211.                                                                                                            | আপনি কি মনে করেন নির্দেশিকাটি সম্পূর্ণ মেনে চলতে কোন বাঁধা আছে? (Do you think there are any barriers that prevent you from following the manual)      | Yes (হ্যাঁ)= 1<br>No (না) = 2<br>Not applicable (জানি না) = 3                     | <input type="checkbox"/>                                                 |
| 212.                                                                                                            | যদি হ্যাঁ হয়, সেটা কি ? (If yes, what is it) Please Proving this Question:<br>-----                                                                  |                                                                                   |                                                                          |
| 213.                                                                                                            | পোস্টার টি বুলন্ত অবস্থায় আছে কি না? (পর্যবেক্ষণ) (Is the poster hanging in the pharmacy) (Observe)                                                  | Yes (হ্যাঁ)= 1<br>No (না) = 2                                                     | <input type="checkbox"/>                                                 |
| “আপনার মূল্যবান সময় আমাদের দেয়ার জন্য আপনাকে অনেক ধন্যবাদ”<br>"Thank you for providing us your valuable time" |                                                                                                                                                       |                                                                                   |                                                                          |
