# Supplementary material for: Effectiveness of an educational intervention to improve antibiotic dispensing practices for acute respiratory illness among drug sellers in pharmacies, a pilot study in Bangladesh
Source: BMC Health Serv Res. 2018 Aug 31;18:676. doi: 10.1186/s12913-018-3486-y (PMC6119333; doi:10.1186/s12913-018-3486-y)
Supplement: Supplementary file 1 — Poster/Flip chart “Key messages through educational intervention on acute respiratory illness (ARI) management for the drug sellers at pharmacy”. “We had provided a poster to hang in the pharmacy and a flip chart to keep in the pharmacy desk to each drug sellers of the selected study pharmacies with the key messages from the training/education intervention on ARI management” (PDF 72 kb) [file 12913_2018_3486_MOESM1_ESM.pdf]

**Appendix 1: Poster/Flip chart "Key messages through educational intervention on acute respiratory illness (ARI) management for the drug sellers at pharmacy"**

**Symptoms of acute respiratory illness (for both children and adults):**

- Runny nose, stuffy nose or nasal congestion, cough, breathing difficulty

**Any of these above symptoms with or without the symptoms below**

- Fever, sore throat, sneezing

**Advice about acute respiratory illness:**

**What to do**

**For children (2 months to 5 years):**

- Keep the baby warm in winter

**For children (>2 months) and adults:**

- If febrile, give acetaminophen, sponge the whole body, and encourage drinking of plenty of water for patients 6 months and above.
- Also, follow-up in 2 days if complicated ARI or 5 days if uncomplicated ARI and symptoms have not improved

**Advice about acute respiratory illness: What should NOT be done/given**

**For children (2 months to 5yrs):**

- Antibiotic except for pneumonia,
- Medicines containing Pseudoephedrine
- Antihistamine
- Changing regular food or stop breast feeding in breastfed baby

**For children (2 months and older) and adults:**

- Steroid, NSAID (non steroidal anti-inflammatory drug)/Pain killer for fever

**For all children aged <2 months, refer to physician.**

**For children aged 2 months to <5 years, see box below for referral guidelines.**

**For children (2 months and older) and adults:**

- Severe fever, chest pains, or headaches
- **Breathing difficulties** such as wheezing or shortness of breath (for children >5yrs of age and adults)
- Blood with cough,
- Cough >3 consecutive weeks

**Contact physician**

**Cough and or runny nose and fever (adults):** Over the counter drugs as cough syrups and antihistamines can be given with acetaminophen if fever.

**Advice:** To relieve the cough **drink warm lime water, honey, lemon tea or warm salt water gargling**

| Classification of cough or breathing difficulty among children <5 years                                                                                                                                                                                                                                                                                                                         |                                                                                                                                                                                                                                                                                                                                                                                                                                                          |                                                                                                                                                                                                                                                                                                                                                                                                                                                           |
|-------------------------------------------------------------------------------------------------------------------------------------------------------------------------------------------------------------------------------------------------------------------------------------------------------------------------------------------------------------------------------------------------|----------------------------------------------------------------------------------------------------------------------------------------------------------------------------------------------------------------------------------------------------------------------------------------------------------------------------------------------------------------------------------------------------------------------------------------------------------|-----------------------------------------------------------------------------------------------------------------------------------------------------------------------------------------------------------------------------------------------------------------------------------------------------------------------------------------------------------------------------------------------------------------------------------------------------------|
| <p><b>Severe pneumonia Or Very severe disease</b></p> <p><b>Any general danger sign or chest indrawing</b></p> <p><b>*General Danger signs:</b></p> <ul style="list-style-type: none"> <li>▪ Inability to drink or breastfeed, Repeated vomiting, Convulsion, Lethargy/abnormally sleepy/unconscious</li> </ul> <p><b><u>Management</u></b><br/>Refer <b>URGENTLY</b> to physician/hospital</p> | <p><b>Pneumonia</b></p> <p><b>Fast breathing</b></p> <ul style="list-style-type: none"> <li>▪ 2 months to 12 months- 50 or more respiration per minute</li> <li>▪ 12 months to 59 months-40 or more respiration per minute</li> <li>▪ <b><u>Management</u></b> Antibiotic (Oral <b>Amoxycillin</b>) for 5 days</li> <li>▪ Advise the caretaker to return immediately if the child develops danger signs</li> <li>▪ Follow-up in <b>2 days</b></li> </ul> | <p><b>No pneumonia: cough or cold</b></p> <p>No signs of pneumonia or very severe disease</p> <ul style="list-style-type: none"> <li>▪ <b><u>Management</u></b> If coughing for more than <b>3 weeks</b> contact physician</li> <li>▪ To relieve the cough <b>drink warm lime water, honey, lemon tea</b></li> <li>▪ Advise the mother when (<b>*danger sign</b>) to return immediately</li> <li>▪ Follow up in <b>5 days</b> if not improving</li> </ul> |

**Over the counter drugs: For acute respiratory illness (For adults)**

- Dextromethorphan (Cough suppressants)
- Guaiphenesin+pseudoephedrine (Cough expectorants)
- Loratadine (Non-sedating antihistamine)
- Chloropheniramine (Sedating antihistamine)
- Diphenhydramine (Sedating antihistamine)
- Promethazine (Sedating antihistamine)
- Paracetamol
- Norsol drop
